# Supplementary material for: Mutations in the notch signalling pathway are associated with enhanced anti‐tumour immunity in colorectal cancer
Source: PubMed Central journal article supplement (PMC7579712; doi:10.1111/jcmm.15867), 2020-09-14
Supplement: JCMM-24-12176-s003.pdf [file JCMM-24-12176-s003.pdf]

**Table 1 Clinicopathological characteristics between mutation and non-mutation groups**

|                | Non-mutations(368) | Mutations(157) | <i>p</i> |
|----------------|--------------------|----------------|----------|
| Age(years)     | 65.41±12.415       | 66.87±14.264   | 0.267    |
| Sex            |                    |                | 0.653    |
| male           | 192                | 79             |          |
| female         | 174                | 78             |          |
| Stage          |                    |                | 0.005    |
| I              | 66(18.8)           | 27(17.5)       |          |
| II             | 119(33.8)          | 76(49.4)       |          |
| III            | 112(31.8)          | 38(24.7)       |          |
| IV             | 55(15.6)           | 13(8.4)        |          |
| T              |                    |                | 0.61     |
| Tis            | 1(0.3)             | 0(0)           |          |
| T1             | 12(3.3)            | 5(3.2)         |          |
| T2             | 69(18.9)           | 25(15.9)       |          |
| T3             | 241(65.8)          | 113(72)        |          |
| T4             | 43(11.7)           | 14(8.9)        |          |
| N              |                    |                | 0.013    |
| N0             | 198(54.2)          | 107(68.2)      |          |
| N1             | 98(26.8)           | 30(19.1)       |          |
| N2             | 69(18.9)           | 20(12.7)       |          |
| M              |                    |                | 0.035    |
| M0             | 263(83)            | 125(90.6)      |          |
| M1             | 54(17)             | 13(9.4)        |          |
| Location       |                    |                | 0.79     |
| colon          | 267(74.4)          | 117(75.5)      |          |
| rectum         | 92(25.6)           | 38(24.5)       |          |
| Pathology      |                    |                | 0.016    |
| adenocarcinoma | 320(89.1)          | 126(81.3)      |          |
| mucinous       | 39(10.9)           | 29(18.7)       |          |

**Table S1 Somatic mutations of notch pathway detected by whole exome sequencing in single cell sequencing cohort**

| Patient | Genomic mutation | Exonic function     | Gene   | c_DNA mutation | Protein mutation |
|---------|------------------|---------------------|--------|----------------|------------------|
| P0701   | 4:153244185,G>A  | stopgain            | FBXW7  | c.C1444T       | p.R482X          |
|         | 4:153247289,G>A  | missense_SNV        | FBXW7  | c.C985T        | p.R329C          |
| P1012   | 9:139402561,C>G  | missense_SNV        | NOTCH1 | c.G1046C       | p.G349A          |
| P0215   | 4:153332832,G>A  | stopgain            | FBXW7  | c.C124T        | p.Q42X           |
| P0123   | 1:120548005,C>A  | missense_SNV        | NOTCH2 | c.G113T        | p.C38F           |
|         | 4:153247303,T>C  | missense_SNV        | FBXW7  | c.A971G        | p.H324R          |
| P0909   | 4:153244155,TC>T | frameshift_deletion | FBXW7  | c.1473delG     | p.G491fs         |
|         | 9:139395150,T>C  | missense_SNV        | NOTCH1 | c.A5788G       | p.T1930A         |

**Table S2 Top 20 genes of each CD8<sup>+</sup> T cell cluster**

| <b>CD8<sup>+</sup> T cells cluster name</b> | <b>Top 20 genes</b>                                                                                                                                                       |
|---------------------------------------------|---------------------------------------------------------------------------------------------------------------------------------------------------------------------------|
| 0                                           | <i>CXCR4, SRGN, TNFAIP3, CREM, YPEL5, LMNA, PDE4B, DUSP2, ZFP36, TSC22D3, RGCC, RNF19A, TUBA4A, DDIT4, ANXA1, HERPUD1, CCL4, DCTN6, CRTAM, GPR183</i>                     |
| 1                                           | <i>GPR15, TMIGD2, CD160, ITGAI, FOS, KLRC2, CD69, CAPG, PTGER4, FOSB, KLRC3, NR4A2, HOPX, KLRC1, XCL1, SMIM3, MAP3K8, NFKBIZ, BRE-AS1, XCL2</i>                           |
| 2                                           | <i>SIPRI, LINC00861, RIPOR2, TXNIP, RPS14, GIMAP7, PLAC8, SELL, RPL34, FCMR, RPLP2, IL7R, GIMAP1-GIMAP5, GZMK, GIMAP5, KLRG1, RPL36, CCR7, CMC1, S100A4</i>               |
| 3                                           | <i>FGFBP2, CX3CR1, SIPR5, FCGR3A, NKG7, FGR, PLEK, GZMH, ADGRG1, FCRL6, PRF1, S100A4, ITGB2, PLAC8, PATL2, KLRG1, TTC38, ADRB2, GNLY, C1orf162</i>                        |
| 4                                           | <i>CXCL13, HAVCR2, CCR1, TNFSF4, CXCR6, MIR155HG, PDCD1, CD82, OAS1, CD27, APOBEC3C, CD27-AS1, CD2, APOBEC3G, IFI44, MIR155, IFI6, ACP5, CCL3, GZMB</i>                   |
| 5                                           | <i>PCLAF, ZWINT, CXCL13, HAVCR2, TK1, MIR3917, TYMS, KRT86, RRM2, CD82, GEM, CCL3, NUSAP1, TNFRSF18, STMN1, VCAMI, MCM7, PCNA-AS1, HMGB2, TUBA1B</i>                      |
| 6                                           | <i>HSPA1L, HSPA1A, HSPA1B, DNAJB1, HSP90AA1, HSPA8, DNAJA1, HSP90AB1, EGRI, HSP E1, HSPH1, JUN, HSPD1, NR4A1, BAG3, DNAJB4, ZFAND2A, HSPA6, HSPB1, IFNG</i>               |
| 7                                           | <i>SNORD27, SNORD28, SNORD26, SNORD29, SNORD25, SNORD30, SNORD22, SNORD31, SNHG1, CXCR4, ZFP36, ZNF331, TSC22D3, LMNA, SNORA44, TUBB4B, SNORA61, TOB1, DCTN6, SNORD99</i> |

**Table S3 Top 20 genes of each Treg cell cluster**

| <b>Treg cells cluster name</b> | <b>Top 20 genes</b>                                                                                                                                            |
|--------------------------------|----------------------------------------------------------------------------------------------------------------------------------------------------------------|
| 0                              | <i>DNAJB1, DUSP1, JUNB, HSP90AA1, FOS, NR4A2, PPP1R15A, HSPA1A, DNAJA1, PMAIP1, BTG2, CXCR4, EGRI, JUN, HSPE1, TOB1, RGS2, SNORD22, CD69, DNAJB4</i>           |
| 1                              | <i>TNFRSF4, TNFRSF18, TNFRSF9, PKM, ZBTB32, CDKN1A, CD83, IL1RN, LDHA, ICOS, SYNGR2, IL2RA, IL1R2, NFKBIA, NINJ1, EB13, LGALS1, PTP4A3, NFKBID, GNLY</i>       |
| 2                              | <i>OAS1, FOXP3, HLA-DQA1, HLA-DRA, SLAMF1, CXCR3, CD74, MX1, PIK3IP1, IL2RB, STAT1, SLA, HLA-DRB6, IDH2, CISH, CXCR6, IF16, C3AR1, LY6E, RTP4</i>              |
| 3                              | <i>AES, P116, CD52, RIPOR2, LIME1, GIMAP4, TXNIP, LEF1, GIMAP7, TRAF3IP3, LDHB, MAL, BIN2, GSTK1, GIMAP1-GIMAP5, SELL, ITGB1, RNF214, GIMAP5, TRAT1</i>        |
| 4                              | <i>GPR25, IL17A, IL17F, GPR34, CTSH, TMIGD2, MIR5690, KLRB1, TMSB4X, LINC00892, CD40LG, JAML, GIMAP5, GZMA, GIMAP1-GIMAP5, CD52, CAPG, ALOX5AP, GZMB, CCL5</i> |

Table S4 Somatic mutations of notch pathway related genes in TCGA cohort

|                              | all | single | Ratio(all/526) |
|------------------------------|-----|--------|----------------|
| No mutation                  | 368 | -      | 69.9%          |
| Notch1 mutation              | 22  | 9      | 4.2%           |
| Notch2 mutation              | 25  | 3      | 4.8%           |
| Notch3 mutation              | 32  | 10     | 6.1%           |
| Notch4 mutation              | 24  | 7      | 4.6%           |
| Adam10 mutation              | 17  | 8      | 3.2%           |
| Adam17 mutation              | 13  | 3      | 2.5%           |
| $\gamma$ -secretase mutation | 29  | 9      | 5.5%           |
| Numb mutation                | 9   | 1      | 1.7%           |
| Fbxw7 mutation               | 92  | 61     | 17.5%          |
